# Supplementary material for: CIELab chromaticity evolution to measure the binding free energy of non-colored biomolecules to gold nanoparticles
Source: Royal Society of Chemistry journal article supplement (doi:10.1039/c5ra15119h), 2015-01-01
Supplement: c5ra15119h1.pdf [file c5ra15119h1.pdf]

# CIELab Chromaticity Evolution to Measure Binding Free Energy of Non-colored Biomolecules to Gold Nanoparticles.

R. Prado-Gotor<sup>a\*</sup>, A. Jimenez-Ruiz<sup>a\*</sup>, J.M. Carnerero<sup>a</sup>, E. Grueso<sup>a</sup>, I. Villa<sup>a</sup>

<sup>a</sup> Department of Physical Chemistry, University of Seville.  
C/Profesor García González, s/n. 41012 Seville (Spain).  
[pradogotor@us.es](mailto:pradogotor@us.es), [aljimrui@alum.us.es](mailto:aljimrui@alum.us.es)

## Supporting Information

### Obtention of CIELab parameters

XYZ colorimetric parameters were obtained from experimental measurements by using the following mathematical expressions:

$$X = K \sum_{\lambda} T_{\lambda} S_{\lambda} X_{10(\lambda)} \Delta_{\lambda}$$

$$Y = K \sum_{\lambda} T_{\lambda} S_{\lambda} Y_{10(\lambda)} \Delta_{\lambda}$$

$$Z = K \sum_{\lambda} T_{\lambda} S_{\lambda} Z_{10(\lambda)} \Delta_{\lambda}$$

$$K = 100 / \sum_{\lambda} S_{\lambda} \bar{Y}_{10(\lambda)} \Delta_{\lambda}$$

where  $T_{\lambda}$  is the transmittance of the sample;  $S_{\lambda}$  is a coefficient which depends on both  $\lambda$  and the illuminant (in our case, a D65 illuminant was employed) and  $X_{10(\lambda)}$ ,  $Y_{10(\lambda)}$ ,  $Z_{10(\lambda)}$  are functions of both  $\lambda$  and the observer. Conversion from XYZ values to  $L^*a^*b^*$  was done directly by using white point values for the D65 illuminant and 10° observer:<sup>2</sup>

$$X_n = 94.825; Y_n = 100; Z_n = 107.38$$

$L^*a^*b^*$  values were calculated as follows:<sup>3</sup>

$$L^* = 116 (Y/Y_n)^{1/3} - 16$$

$$a^* = 500[f(X/X_n) - f(Y/Y_n)]$$

$$b^* = 200[f(Y/Y_n) - f(Z/Z_n)]$$

where:

$$f(X/X_n) = (X/X_n)^{1/3}$$

$$f(Y/Y_n) = (Y/Y_n)^{1/3}$$

$$f(Z/Z_n) = (Z/Z_n)^{1/3}$$

## Figures

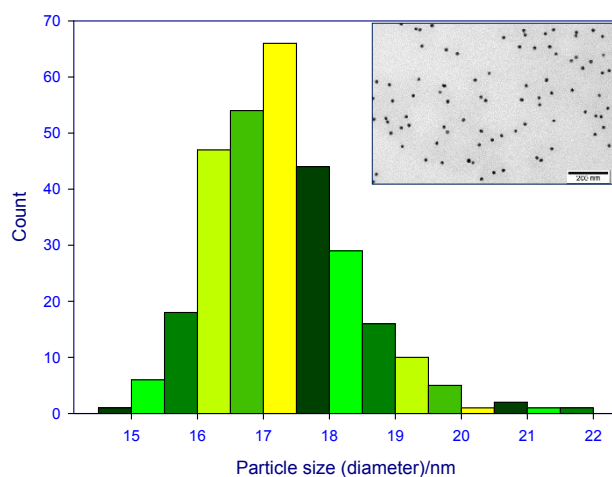

**Figure S1.** Size distribution of synthesized AuNPs.

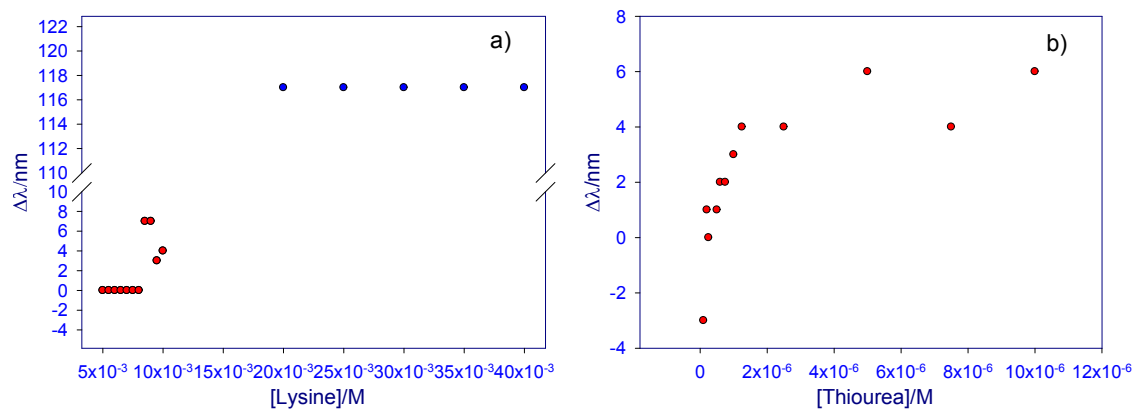

**Figure S2.** Wavelength shift ( $\Delta\lambda$ ) of the maximum intensity absorbance peak for solutions containing  $[\text{AuNPs}] = 3.2 \times 10^{-10} \text{ M}$  and varying concentrations of a) lysine, b) thiourea.

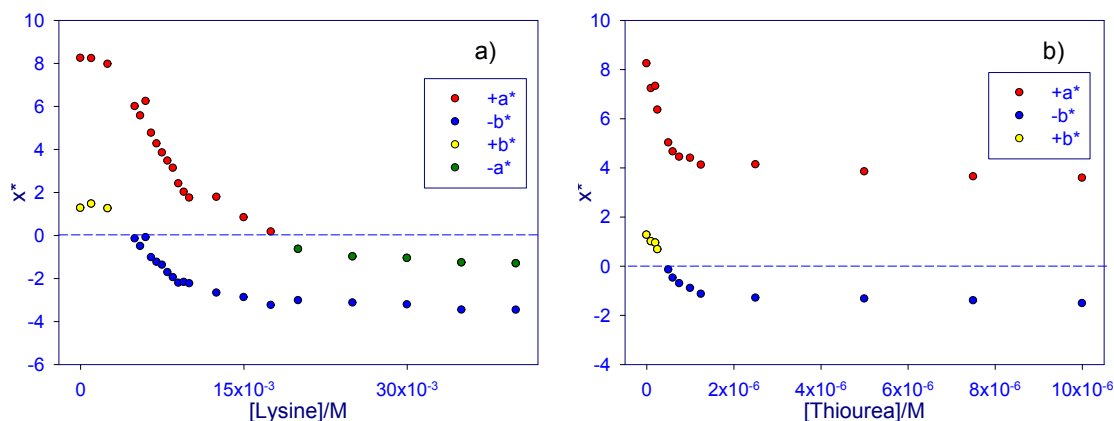

**Figure S3.**  $a^*$  and  $b^*$  parameters for a series of  $[\text{AuNPs}] = 3.2 \times 10^{-10} \text{ M}$  solutions containing a) lysine and b) thiourea. Green-colored points indicate negative values of  $a^*$  which account for a green tone in the CIELab color system, and are indicative of fully blue (as opposed to purple) nanoparticle solutions.

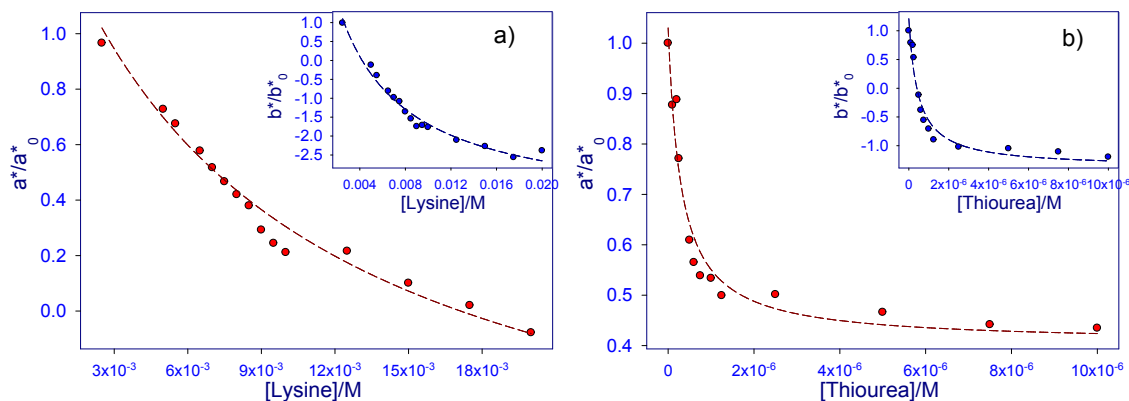

**Figure S4.** Two-state model fitting for normalized  $a^*$  and  $b^*$  (shown in the inset) parameters of AuNPs/biomolecule solutions. a)  $[\text{AuNPs}] = 3.2 \times 10^{-10} \text{ M}$ ;  $[\text{Lysine}] = 2.5 \times 10^{-3} - 2 \times 10^{-2} \text{ M}$ , b)  $[\text{AuNPs}] = 3.2 \times 10^{-10} \text{ M}$ ;  $[\text{Thiourea}] = 0 - 1 \times 10^{-5} \text{ M}$ .

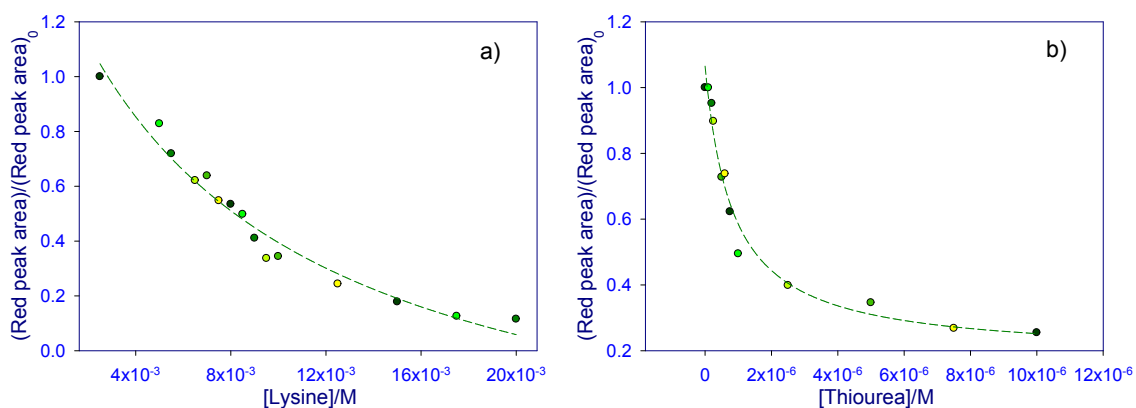

**Figure S5.** Two-state model fit for the red (non-aggregated) deconvolution peak area for a) a series of AuNPs/lysine solutions ranging from  $[\text{Lysine}] = 2.5 \times 10^{-3} - 2 \times 10^{-2} \text{ M}$  and b) a series of AuNPs/thiourea solutions ranging from  $[\text{Thiourea}] = 0 - 1 \times 10^{-5} \text{ M}$ .

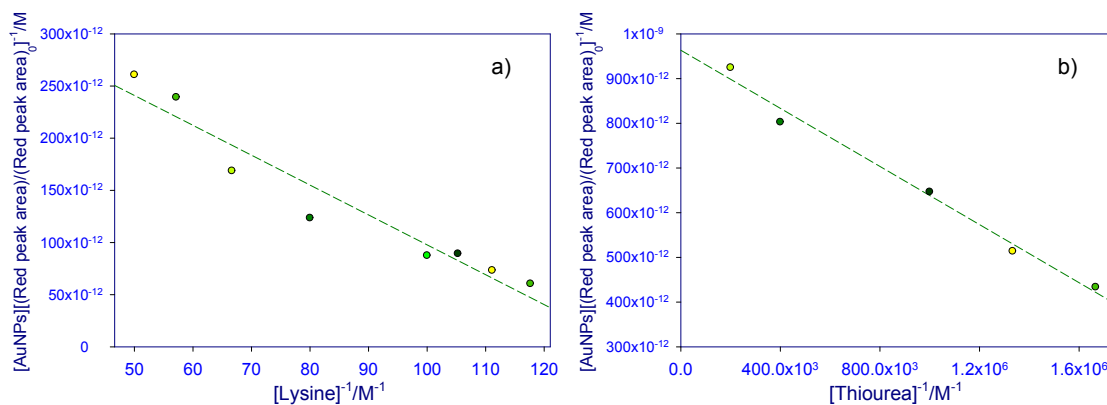

**Figure S6.** Benesi-Hildebrand fit for the normalized red peak area obtained from deconvolution procedures for a) AuNPs/lysine solutions ranging from  $[\text{Lysine}] = 8.5 \times 10^{-3}$  to  $2 \times 10^{-2}$  M and b) AuNPs/thiourea solutions ranging from  $[\text{Thiourea}] = 6 \times 10^{-7}$  to  $5 \times 10^{-6}$  M.

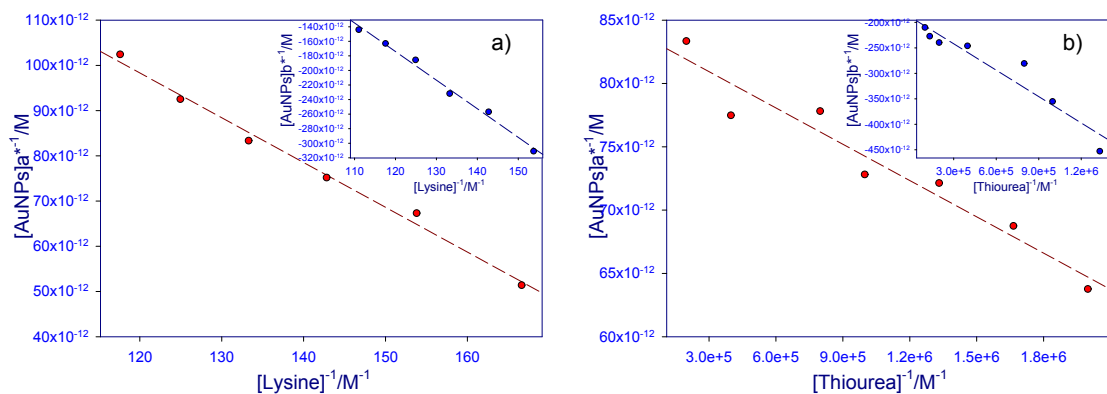

**Figure S7.** Benesi-Hildebrand fit for  $a^*$  and  $b^*$  (shown on inset) for a series of AuNPs solutions ranging from a)  $[\text{Lysine}] = 6 \times 10^{-3}$  to  $9 \times 10^{-3}$  M and b)  $[\text{Thiourea}] = 5 \times 10^{-7}$  to  $1 \times 10^{-5}$  M.
